# Supplementary material for: Pt-porous ZnO nanoribbon hybrid materials with enhanced catalytic performances
Source: Royal Society of Chemistry journal article supplement (doi:10.1039/c4ce02458c), 2015-01-01
Supplement: c4ce02458c1.pdf [file c4ce02458c1.pdf]

## **Pt-porous ZnO nanoribbon hybrid materials with enhanced catalytic performance**

**Zhiqiang Cheng,<sup>1,2</sup> Mingyue Yu,<sup>\*3</sup> Guixia Yang,<sup>1</sup> and Lijuan Kang<sup>\*1</sup>**

<sup>1</sup> College of Resources and Environment, Jilin Agricultural University, Changchun, 130118, P.R China.

<sup>2</sup> School of Aerospace Engineering, Tsinghua University, Beijing, 100000, P.R China.

<sup>3</sup> Changchun university of science and technology, Changchun, 130118, P.R China.

E-mail: mingyue141210@126.com, kanglijuan61@126.com

## Experimental Section:

Synthesis of sub 3 nm Pt nanoparticles.

Typically, 10 mL  $\text{K}_2\text{PtCl}_4$  aqueous solution (0.02 mM), 0.11 g PVP and 10 mL ethylene glycol are mixed together. After stirring for 15 min at room temperature, the mixture is hydrothermal treated at 130 °C for 3 hours. After cooling down to room temperature naturally, the as-obtained products are collected by the help of acetone and finally re-disperse in 40 mL water for further use.

Synthesis of  $\text{Pt-Zn}_5(\text{CO}_3)_2(\text{OH})_6$ :

1 mmol  $\text{Zn}(\text{oAc})_2$  and 1 mmol L-lysine are dissolved in 7 mL water. Then 3 ml Pt colloid solution is added. Finally, the mixture is put into a Teflon autoclave and heated at 140 °C for 12 hours. After cooling down to room temperature naturally, the products are collected by centrifugation and dried at 60 °C overnight.

Synthesis of Pt-ZnO nanoribbon:

The above obtained  $\text{Pt-Zn}_5(\text{CO}_3)_2(\text{OH})_6$  power is further heated at 450 °C for 2 hours at a heating rate of 2 °C /min.

Synthesis of ZnO nanorod:

ZnO nanorods are synthesized according to the well-established HMT-assisted hydrothermal method.<sup>13, 21</sup> 80 mL of 0.01 M aqueous solution of  $\text{Zn}(\text{NO}_3)_2$  and HMT was put into a Teflon autoclave with a volume of 100 ml and heated at 95 °C for 5 h.

Photocatalytic Measurement:

50 mg of as-prepared nanocatalyst is added to 100 mL of 0.01 mM methyl orange (MO) aqueous solution. The mixture is treated under UV irradiation with a Xe arc lamp (400 W) with constant magnetic stirring to ensure a higher level of homogeneity of photocatalyst presence in the suspension. 5 mL of sample is drawn with a syringe. The concentration of MO is determined using a UV-VIS-NIR spectrophotometer.

Catalytic CO oxidation:

30 mg of catalyst is put in a stainless steel reaction tube. The experiment was carried out under a flow of reactant gas mixture (1 %  $\text{CO}$ , 20 %  $\text{O}_2$ , balanced with  $\text{N}_2$ ) at a rate of 30 mL/min. The composition of the gas was monitored on-line by gas chromatography.

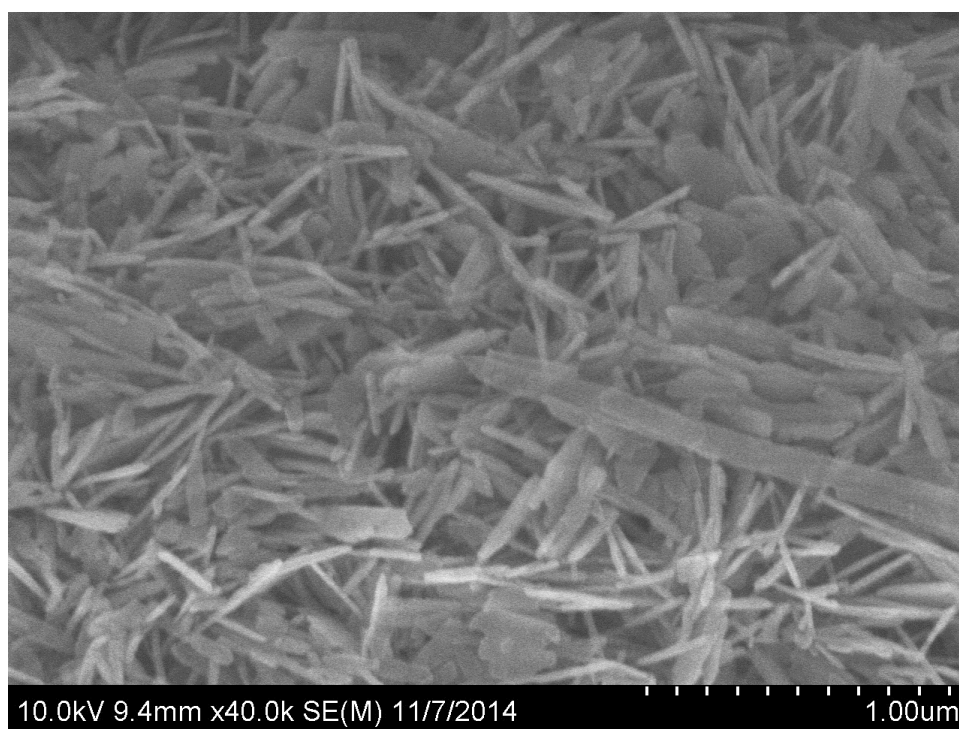

**Figure S1.** TEM image of Pt-Zn<sub>5</sub>(CO<sub>3</sub>)<sub>2</sub>(OH)<sub>6</sub>.

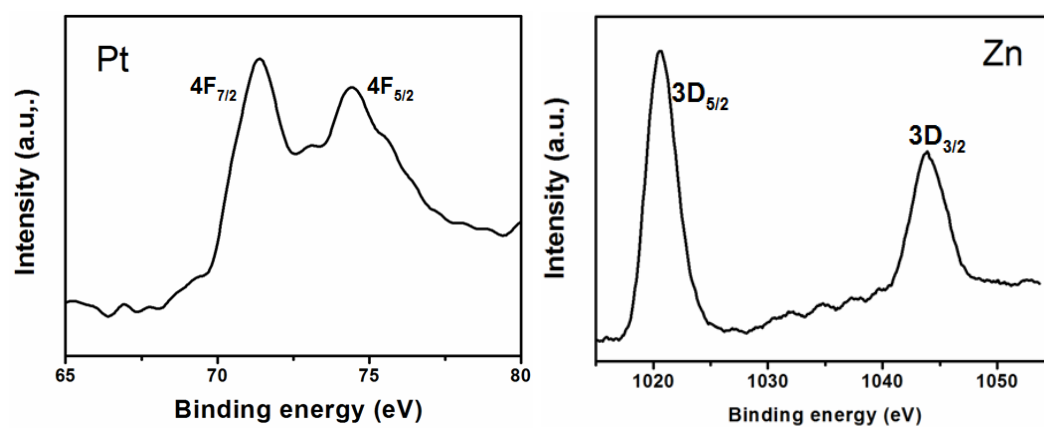

**Figure S2.** XPS data of Pt and Zn in Pt-ZnO nanoribbon.

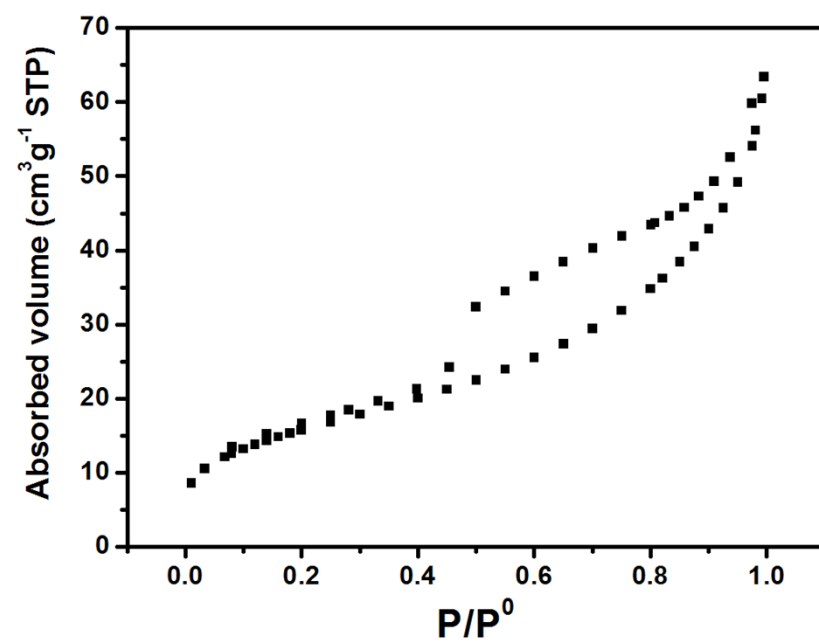

**Figure S3.** BET curve of Pt-ZnO nanoribbons.

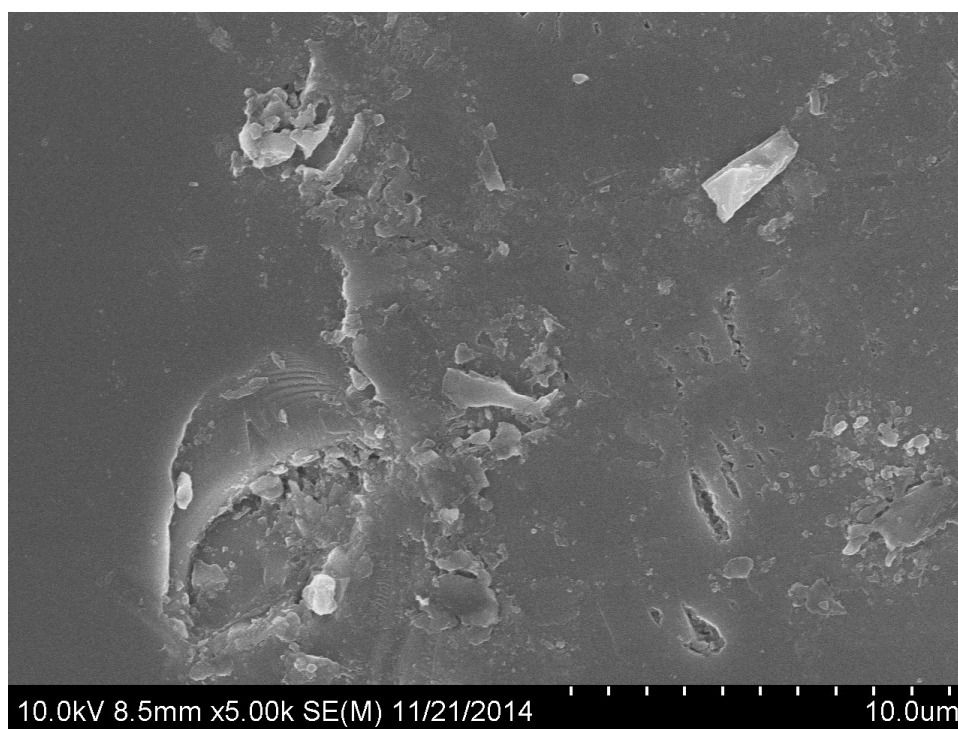

**Figure S4.** SEM image of Pt-Zn<sub>5</sub>(CO<sub>3</sub>)<sub>2</sub>(OH)<sub>6</sub> obtained without addition of L-lysine in the reaction solution..

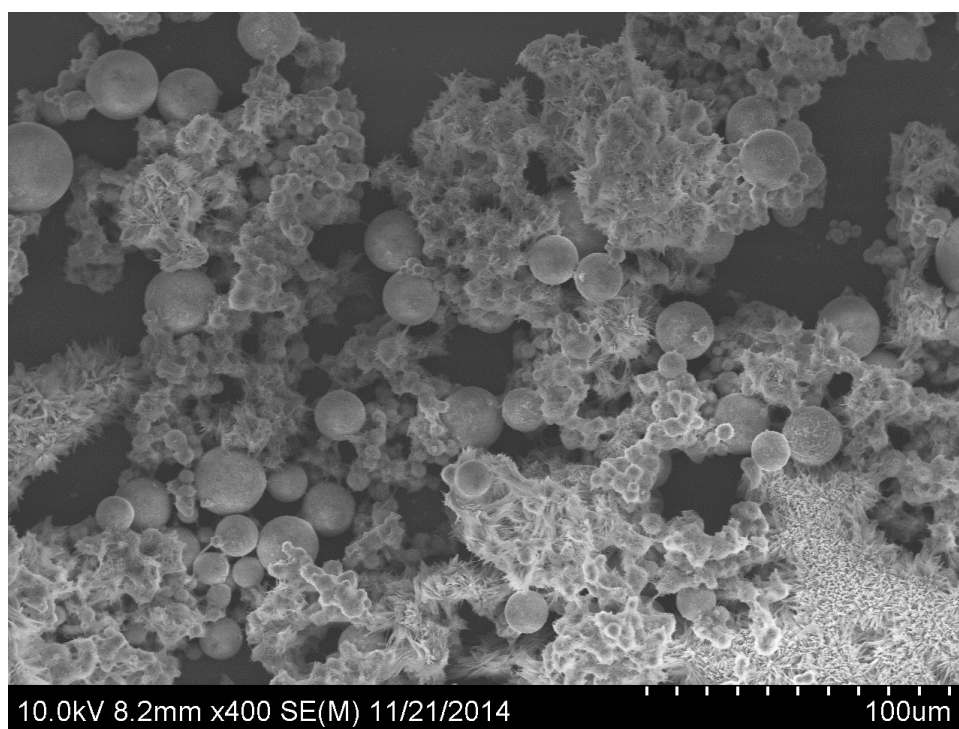

**Figure S5.** SEM image of Pt-Zn<sub>5</sub>(CO<sub>3</sub>)<sub>2</sub>(OH)<sub>6</sub> obtained by addition of 2 mmol urea in the reaction solution..

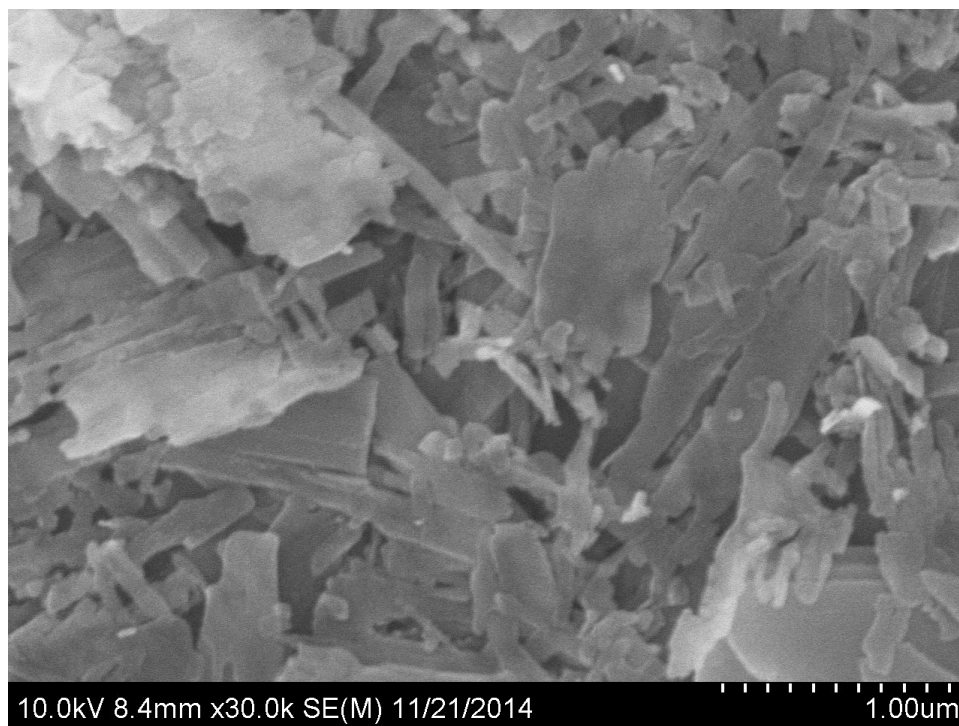

**Figure S6.** SEM image of Pt-Zn<sub>5</sub>(CO<sub>3</sub>)<sub>2</sub>(OH)<sub>6</sub> obtained by addition of 10 mmol urea in the reaction solution.



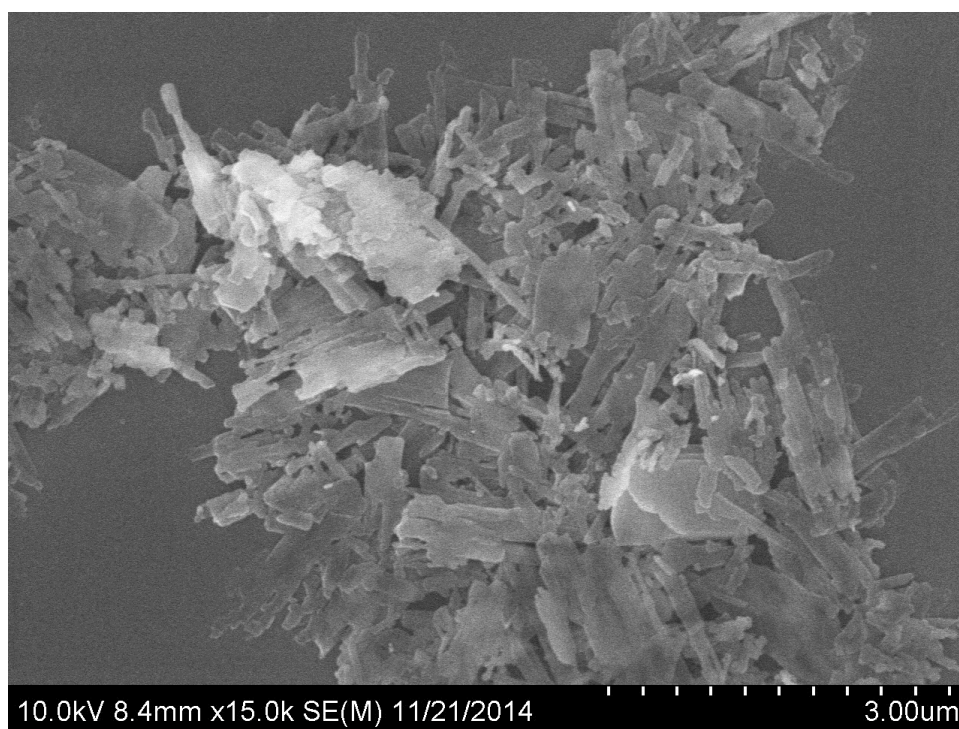

**Figure S7.** SEM image of Pt-Zn<sub>5</sub>(CO<sub>3</sub>)<sub>2</sub>(OH)<sub>6</sub> prepared by heat-treatment at 180 °C for 12 hours.

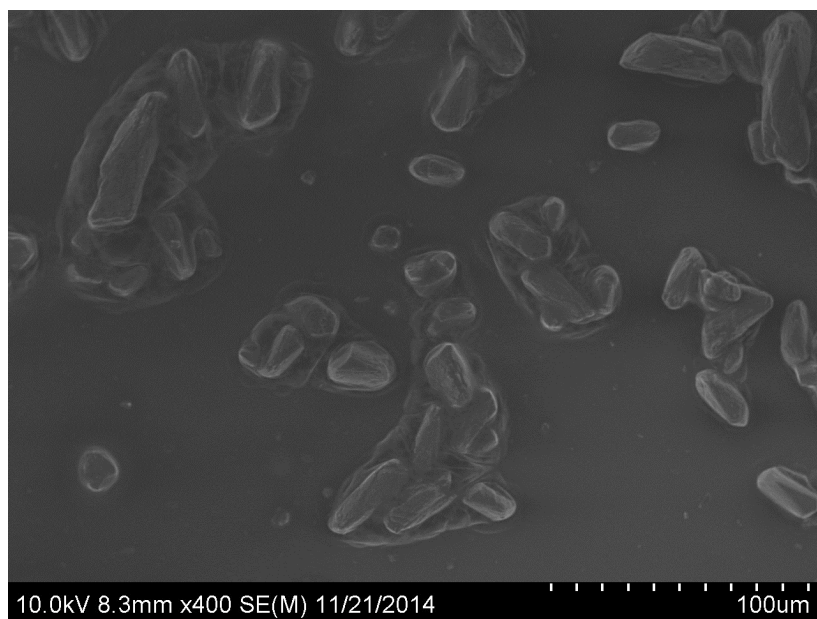

**Figure S8.** SEM image of Pt-Zn<sub>5</sub>(CO<sub>3</sub>)<sub>2</sub>(OH)<sub>6</sub> prepared by heat-treatment at 120 °C for 12 hours.

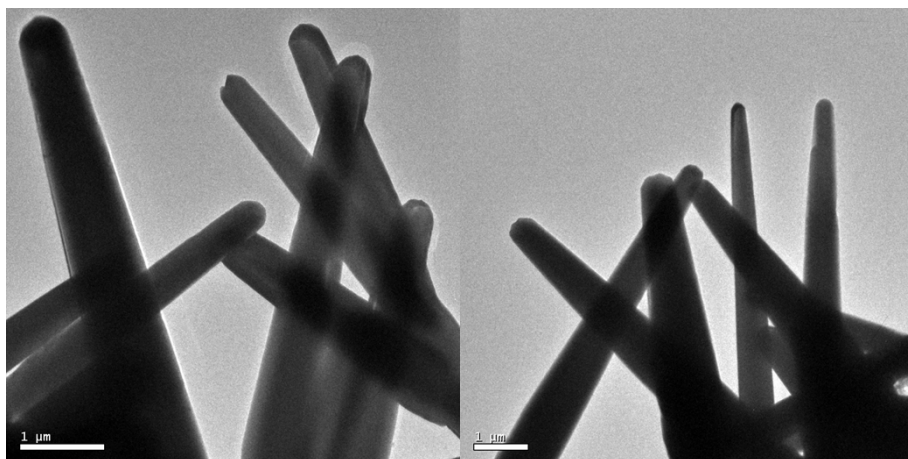

**Figure S9.** TEM images of ZnO nanorods.

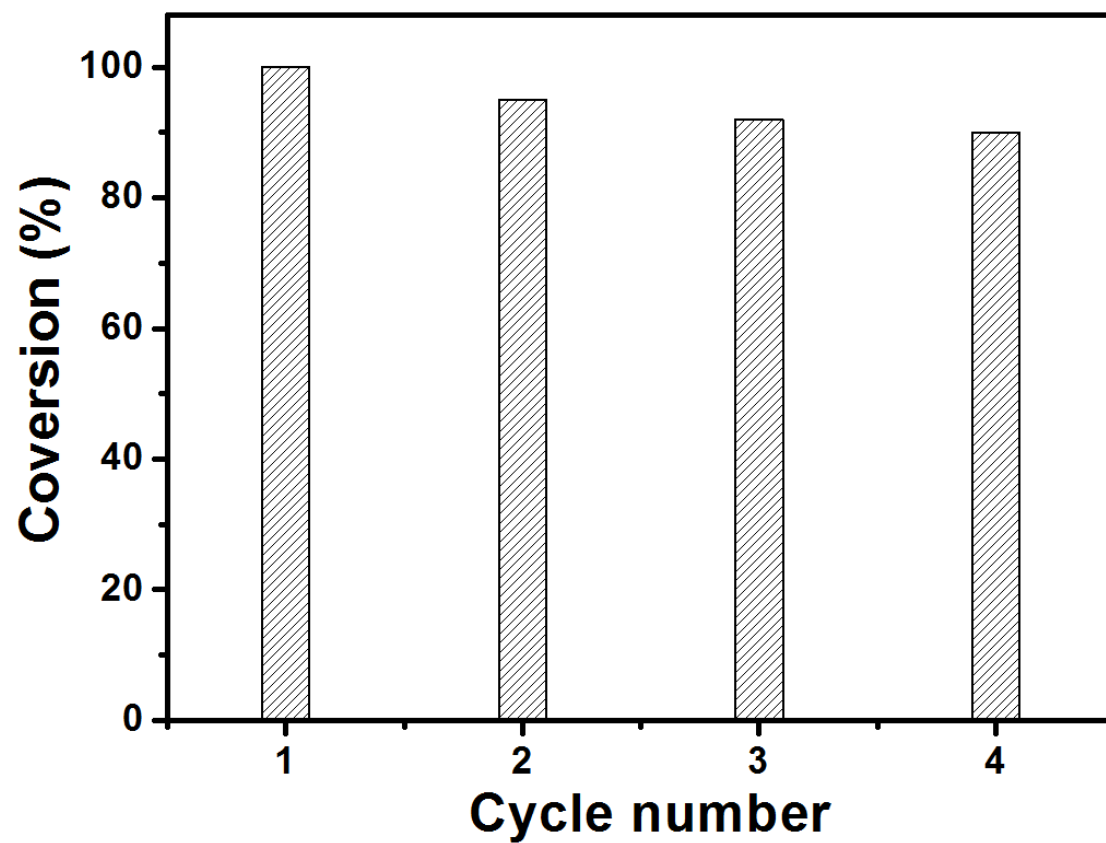

**Figure S10.** the cycling test of Pt-ZnO nanoribbon on the catalytic reaction of Photocatalytic degradation of MO.
